# Four-sphere head model for EEG signals revisited

Solveig Næss<sup>1#</sup>, Chaitanya Chintaluri<sup>2#</sup>, Torbjørn V. Ness<sup>3</sup>,  
Anders M. Dale<sup>4</sup>, Gaute T. Einevoll<sup>3,5\*</sup> and Daniel K. Wójcik<sup>2\*</sup>

<sup>1</sup>Department of Informatics, University of Oslo, Oslo, Norway

<sup>2</sup>Department of Neurophysiology, Nencki Institute of Experimental  
Biology of Polish Academy of Sciences, Warsaw, Poland

<sup>3</sup>Faculty of Science and Technology,  
Norwegian University of Life Sciences, Ås, Norway

<sup>4</sup>Departments of Neurosciences and Radiology,  
University of California, San Diego, La Jolla, CA, USA

<sup>5</sup>Department of Physics, University of Oslo, Oslo, Norway

# Equal contribution

\*Corresponding Authors.

email: d.wojcik@nencki.gov.pl, gaute.einevoll@nmbu.no

April 6, 2017

## Abstract

Electric potential recorded at the scalp (EEG) is dominated by contributions from current dipoles set by active neurons in the cortex. Estimation of these currents, called 'inverse modeling', requires a 'forward' model, which gives the potential when the positions, sizes, and directions of the current dipoles are known. Different models of varying complexity and realism are used in the field. An important analytical example is the *four-sphere model* which assumes a four-layered spherical head where the layers represent brain tissue, cerebrospinal fluid (CSF), skull, and scalp, respectively. This model has been used extensively in the analysis of EEG recordings. Since it is analytical, it can also serve as a benchmark against which numerical schemes, such as the Finite Element Method (FEM), can be tested. While conceptually clear, the mathematical expression for the scalp potentials in the four-sphere model is quite cumbersome, and we observed the formulas presented in the literature to contain

17 errors. We here derive and present the correct analytical formulas for future reference.  
18 They are compared with the results of FEM simulations of four-sphere model. We  
19 also provide scripts for computing EEG potentials in this model with the correct  
20 analytical formula and using FEM.

21 **Keywords:** four-sphere model, head model, EEG, dipole source, LFP, FEM

## 22 1 Introduction

23 Electroencephalography (EEG), that is, the recording of electrical potentials at the scalp,  
24 has been of key importance for probing human brain activity for more than half a cen-  
25 tury (Schomer and da Silva, 2012). It is common to interpret the EEG signal in terms of  
26 current dipoles set up by active neurons (Hämäläinen et al., 1993; Sanei and Chambers,  
27 2007). Estimation of the underlying sources based on EEG signals is called *inverse modeling*,  
28 and its key ingredient is a *forward model* for computation of the resulting signal from known  
29 current sources. While the link between the current sources and the resulting potentials in  
30 principle is well described by volume-conductor theory, the practical application of this  
31 theory is not easy because the cortical tissue, the cerebrospinal fluid (CSF), the skull, and  
32 the scalp, all have different electrical conductivities (Nunez and Srinivasan, 2006).

33 An important analytical forward model is the *four-sphere model* (Srinivasan et al.,  
34 1998; Nunez and Srinivasan, 2006) assuming a four-layered spherical head model where  
35 the four layers represent brain tissue, CSF, skull, and scalp, respectively. The Poisson  
36 equation, which describes the electric fields of the brain within volume-conductor theory,  
37 is solved for each layer separately, and the mathematical solutions are matched at the  
38 layer interfaces to obtain an analytical expression for the EEG signal as set up by a  
39 current dipole in the brain tissue. This model has been extensively used in analysis of  
40 EEG signals, see, e.g., Peraza et al. (2012); Wong et al. (2008); Chu et al. (2012), but  
41 it is also useful for validation of general numerical schemes, such as the Finite Element  
42 Method (FEM) (Larson and Bengzon, 2013). The FEM approach is not limited by specific  
43 assumptions on head symmetry and can, in principle, take into account an arbitrarily  
44 complex spatial distribution of electrical conductivity representing the electrical properties  
45 of the head (Bangera et al., 2010; Huang et al., 2016). This is done by building a numerical  
46 mesh for the head model with the electrical conductivity specified at each mesh point.  
47 The mesh construction is a research problem by itself and several mesh-generation tools  
48 are available, which often provide slightly different results (Geuzaine, 2009; Kehlet, 2016).  
49 The analytical solution for the four-sphere model can thus serve as a ground-truth against  
50 which an FEM implementation can be validated.

51 While conceptually clear, the mathematical expression of the four-sphere forward model  
52 is quite involved, and rederiving the expression we discovered errors in the formulas both in

53 the original paper, Srinivasan et al. (1998), and in the classic EEG reference book, Nunez  
54 and Srinivasan (2006). As a consequence, the listed formulas predict incorrect EEG scalp  
55 potentials. Due to the importance of the four-sphere model, here we derive and present  
56 the correct analytical formulas for future reference. We further show that this formula,  
57 unlike the previous ones, gives predictions in accordance with FEM simulations.

58 To facilitate its use in further research we also provide numerical scripts for computing  
59 EEG potentials with the corrected formulas, as well as FEM simulation code.

## 60 2 Methods

### 61 2.1 Four-sphere model

62 The well-established volume-conductor theory is based on the quasi-static approximation  
63 to the Maxwell's equations. The electric potential  $\Phi$  is found here by solving Poisson's  
64 equation (Nunez and Srinivasan, 2006),

$$\nabla \cdot \sigma(\mathbf{r}) \nabla \Phi(\mathbf{r}, t) = -C(\mathbf{r}, t), \quad (1)$$

where  $C(\mathbf{r}, t)$  is the density of current sources.  $\sigma(\mathbf{r})$  is the position-dependent conductivity of the medium, here assumed to be isotropic so that  $\sigma(\mathbf{r})$  is a scalar. The four-sphere model is a specific solution of this equation which assumes that the conductive medium consists of four spherical layers representing specific constituents of the head: brain tissue, CSF, skull, and scalp (Figure 1A). In the computations below, these layers are labeled by  $s = 1$  to 4, respectively. The conductivity  $\sigma_s(\mathbf{r})$  is assumed to be homogeneous, i.e., constant within each layer and independent of frequency (Pettersen et al., 2012). In the examples below we assume the same values of conductivities and concentric shell radii as in Nunez and Srinivasan (2006), see Table 1. The solution of Equation (1) is subject to the following boundary conditions (where  $s = 1, 2, 3$ ), assuring continuity of both electrical potential and current across the layer boundaries, and no current escaping the outer layer (Nunez and Srinivasan, 2006):

$$\Phi^{s+1}(r_s) = \Phi^s(r_s) \quad (2)$$

$$\sigma_{s+1} \frac{\partial \Phi^{s+1}}{\partial r}(r_s) = \sigma_s \frac{\partial \Phi^s}{\partial r}(r_s) \quad (3)$$

$$\frac{\partial \Phi^4}{\partial r}(r_4) = 0. \quad (4)$$

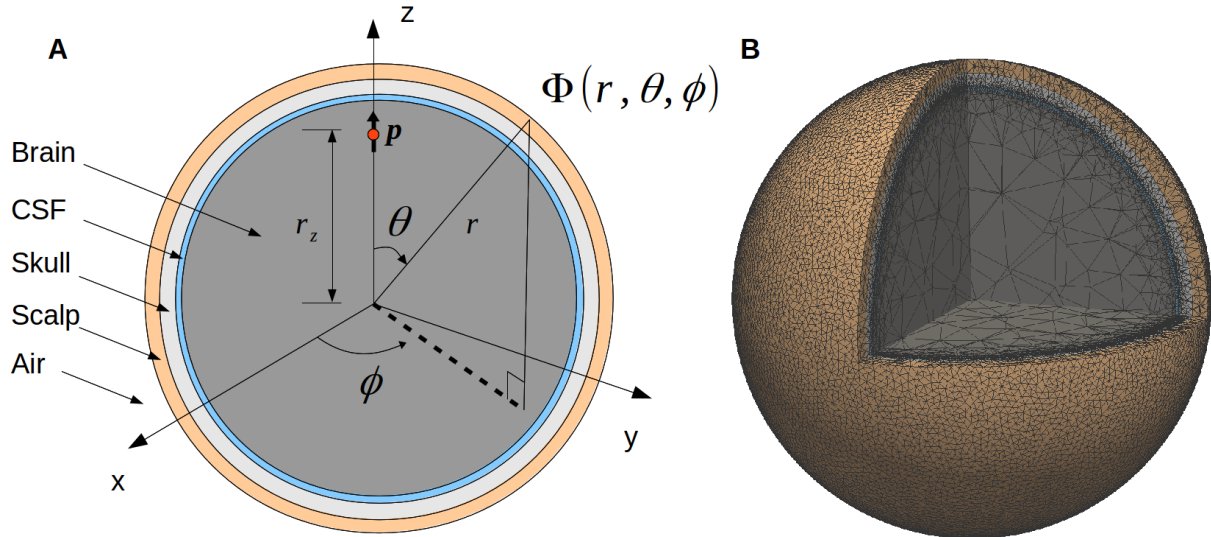

Figure 1: **Illustration of the four-sphere head model.** (A) Cross-section of the four-sphere head model, with the different colors corresponding to the different head layers: brain, CSF, skull, and scalp. The current dipole  $\mathbf{p}$  is located in the brain layer, at a distance  $r_z$  from the center of the sphere. In all the subsequent figures, the dipole is placed in the  $x = 0$  plane, at the  $z$ -axis ( $r_z = 7.8$  cm). (B) Mesh of the four-sphere model used in the FEM simulations illustrating the different electrical conductivity values for each of the spheres.

## 65 2.2 Analytical solution of the four-sphere head model

66 The solution of Equation (1) takes different forms for tangential and radial dipoles, and any  
 67 dipole can be decomposed into a linear combination of these two. The following derivations  
 68 are based on Appendix G and H in Nunez and Srinivasan (2006), and are described in  
 69 more detail in Appendix A.

### 70 2.2.1 Radial dipole

71 Nunez and Srinivasan (2006) give the following equations for calculating extracellular  
 72 potentials from a radial dipole in the four-sphere model: The potential in the inner sphere,  
 73 the brain, is given by  $\Phi^1(r, \theta)$ , while  $\Phi^s(r, \theta)$  gives the potential in CSF, skull, and scalp,  
 74 for  $s = 2, 3, 4$ , respectively,

$$\Phi^1(r, \theta) = \frac{p}{4\pi\sigma_1 r_z^2} \sum_{n=1}^{\infty} \left[ A_n^1 \left( \frac{r}{r_1} \right)^n + \left( \frac{r_z}{r} \right)^{n+1} \right] n P_n(\cos \theta) \quad r_z < r \leq r_1, \quad (5)$$

$$\Phi^s(r, \theta) = \frac{p}{4\pi\sigma_1 r_z^2} \sum_{n=1}^{\infty} \left[ A_n^s \left( \frac{r}{r_s} \right)^n + B_n^s \left( \frac{r_s}{r} \right)^{n+1} \right] n P_n(\cos \theta) \quad r_{s-1} \leq r \leq r_s. \quad (6)$$

76 Here,  $\Phi^s(r)$ , is the extracellular potential measured at location  $r$  in shell number  $s$ , of  
 77 external radius  $r_s$ , from current dipole moment  $p$  located at  $r_z$ . The conductivity of sphere

| Labels | Name  | Radius (cm) | $\sigma$ (S/m)            |
|--------|-------|-------------|---------------------------|
| 1      | Brain | 7.9         | 0.33                      |
| 2      | CSF   | 8.0         | $5 \sigma_{\text{brain}}$ |
| 3      | Skull | 8.5         | $\sigma_{\text{brain}}/K$ |
| 4      | Scalp | 9.0         | $\sigma_{\text{brain}}$   |

Table 1: **Radii and electrical conductivities of the present four-sphere model.**  $\sigma$  is the conductivity in each of the specified regions. Three variants of the model were considered with skull conductivity reduced by a factor  $K$  (20, 40, or 80) compared to the conductivity of the brain.

78  $s$  is denoted by  $\sigma_s$ ,  $A_n^s$  and  $B_n^s$  are constants depending on the shell radii and conductivities,  
79 and  $P_n(\cos \theta)$  is the  $n$ -th Legendre Polynomial where  $\theta$  is the angle between  $r$  and  $r_z$ . From  
80 the boundary conditions listed in Equations (2)–(4), we can compute  $A_n^s$ , for  $s = 1, 2, 3, 4$   
81 and  $B_n^s$ , for  $s = 2, 3, 4$ , using the notation  $\sigma_{ij} \equiv \sigma_i/\sigma_j$  and  $r_{ij} \equiv r_i/r_j$ :

$$A_n^1 = \frac{\frac{n+1}{n}\sigma_{12} + Z_n}{\sigma_{12} - Z_n} r_{z1}^{n+1} \quad (7)$$

$$A_n^2 = \frac{A_n^1 + r_{z1}^{n+1}}{r_{12}^n + r_{21}^{n+1} Y_n} \quad (8)$$

$$B_n^2 = Y_n A_n^2 \quad (9)$$

$$A_n^3 = \frac{A_n^2 + B_n^2}{r_{23}^n + r_{32}^{n+1} V_n} \quad (10)$$

$$B_n^3 = V_n A_n^3 \quad (11)$$

$$A_n^4 = \frac{n+1}{n} \frac{A_n^3 + B_n^3}{\frac{n+1}{n} r_{34}^n + r_{43}^{n+1}} \quad (12)$$

$$B_n^4 = \frac{n}{n+1} A_n^4 \quad (13)$$

82

$$V_n = \frac{\frac{n}{n+1}\sigma_{34} - \frac{r_{34}^n - r_{43}^{n+1}}{n+1} \frac{r_{34}^n + r_{43}^{n+1}}{n}}{\sigma_{34} + \frac{r_{34}^n - r_{43}^{n+1}}{n+1} \frac{r_{34}^n + r_{43}^{n+1}}{n}} \quad (14)$$

$$Y_n = \frac{\frac{n}{n+1}\sigma_{23} - \frac{\frac{n}{n+1}r_{23}^n - V_n r_{32}^{n+1}}{n+1} \frac{r_{23}^n + V_n r_{32}^{n+1}}{n}}{\sigma_{23} + \frac{\frac{n}{n+1}r_{23}^n - V_n r_{32}^{n+1}}{n+1} \frac{r_{23}^n + V_n r_{32}^{n+1}}{n}} \quad (15)$$

$$Z_n = \frac{r_{12}^n - \frac{n+1}{n} Y_n r_{21}^{n+1}}{r_{12}^n + Y_n r_{21}^{n+1}}. \quad (16)$$

83 Equations (5) and (6) are in accordance with Equations (G.1.9–10) in Appendix G  
 84 of Nunez and Srinivasan (2006) and Equation (A–1) in Srinivasan et al. (1998), Appendix A.  
 85 However, some of the above constants (Equations (7)–(16)) are different from the ones  
 86 given in Nunez and Srinivasan (2006) and Srinivasan et al. (1998), see Appendix A for  
 87 specifics.

### 88 2.2.2 Tangential dipole

89 The extracellular potential from a tangential dipole in a concentric-shells model is given by  
 90 Equation (H.2.1) in Appendix H of Nunez and Srinivasan (2006), and takes the following

91 form:

$$\Phi^1(r, \theta, \phi) = \frac{-p}{4\pi\sigma_1 r_z^2} \sin \phi \sum_{n=1}^{\infty} \left[ A_n^1 \left( \frac{r}{r_1} \right)^n + \left( \frac{r_z}{r} \right)^{n+1} \right] P_n^1(\cos \theta) \quad r_z < r \leq r_1 \quad (17)$$

92

$$\Phi^s(r, \theta, \phi) = \frac{-p}{4\pi\sigma_1 r_z^2} \sin \phi \sum_{n=1}^{\infty} \left[ A_n^s \left( \frac{r}{r_s} \right)^n + B_n^s \left( \frac{r_s}{r} \right)^{n+1} \right] P_n^1(\cos \theta) \quad r_{s-1} \leq r \leq r_s, \quad (18)$$

93 where  $\phi$  is the azimuth angle and  $P_n^1$  is the associated Legendre polynomial. When  
 94 solving for the boundary conditions, Equation (2)-(4), we find that the constants  $A_n^s$  and  
 95  $B_n^s$  are the same as for the radial dipole solution, see Section 2.2.1.

96 In the results section we compare our analytical solution and the FEM simulations with  
 97 the two published formulas for the potential in the four-sphere model given in Appendices G  
 98 and H in Nunez and Srinivasan (2006), and in Appendix A in Srinivasan et al. (1998).  
 99 For comparison we also present the approximate solution provided in Appendix G.4 in  
 100 Nunez and Srinivasan (2006). Note that two corrections were done to the model presented  
 101 in Srinivasan et al. (1998) before comparison. First of all, the multiplication factor  $p/\sigma_1$   
 102 was inserted in Equation (A-1), necessary to give potentials in units of volts. Secondly,  
 103 a superscript in Equation (A-8) was changed, such that the right-hand-side included  $A_n^2$   
 104 instead of  $A_n^3$ , since this was obviously a typographical error. For more details on the  
 105 different descriptions of the analytical four-sphere model, see Appendix A.

## 106 2.3 Finite Element Method

107 To find the numerical solution of the four-sphere model we solved the Poisson equation  
 108 (Equation (1)) using the Finite Element Method (FEM). The first step was to construct a  
 109 3D numerical mesh representing the four-sphere head model geometry. We used the open-  
 110 source program `gmsh` (Geuzaine, 2009), optimized using the `netgen` algorithm (Schöberl,  
 111 1997). Figure 1B shows the resulting mesh corresponding to the set of radii listed in Table 1.  
 112 Note that our 3D FEM model-geometry implementation consists of five spheres: scalp,  
 113 skull, cerebrospinal fluid (CSF), and two spheres together representing the brain tissue.  
 114 However, the two innermost spheres (the innermost having a radius of 6 cm) are set to  
 115 have the same conductivity, i.e., the value for brain tissue listed in Table 1. Thus, the  
 116 model is effectively still a four-sphere model. We observed, however, that partitioning the  
 117 four spheres into five and partitioning the inner sphere to a coarser mesh size reduced the  
 118 overall mesh size and computational time while retaining the accuracy. The resulting mesh  
 119 comprised of nearly 12.2 million tetrahedrons (2.1 million odd nodes) and we observed that  
 120 at this resolution, the numerical results had converged.

121 The current sources were treated as point sources and the conductivity was set in  
 122 each mesh point according to Table 1. Finally, the Poisson's Equation and the bound-

123 ary conditions listed in Equations (2)–(4) were solved numerically with FEM. All FEM  
124 simulations were done with the open-source program FEniCS (Logg et al., 2012; Alnæs  
125 et al., 2015), with Lagrange P2 finite elements. The linear systems were solved by the the  
126 *Krylov Solver* employed with the *Conjugate Gradient* method, and the *Incomplete LU*  
127 factorization preconditioner.

## 128 2.4 Software

129 All the Python code for obtaining the potentials from a current dipole placed in a four-  
130 sphere head model using (i) the analytical formulation and (ii) the numerical method (FEM)  
131 are available under the GNU General Public License version 3 here: [https://github.com/](https://github.com/Neuroinflab/fourspheremodel)  
132 `Neuroinflab/fourspheremodel`. Additionally, the Python scripts to generate the figures  
133 presented in this manuscript are also included. We tested this code in Anaconda Scientific  
134 package on a Linux 64 machine. For easy uptake of this resource and verification, we  
135 provide the associated conda environment with all the specific libraries used to run this  
136 software, and a help file.

## 137 3 Results

### 138 3.1 Comparison between analytical and FEM results

139 EEG potentials were computed on the scalp surface with the analytical four-sphere model  
140  $\Phi(r_4, \theta, \phi)$  and compared with the results from the FEM simulations for a current dipole  $\mathbf{p}$ .  
141 To mimic a current dipole set up by cortical neurons, the dipole was placed in the brain  
142 layer ( $s = 1$ ) of the four-sphere head model, close to the CSF boundary, cf. Figure 2A,  
143 E, I. We found that the analytical and FEM models gave similar results for both radial  
144 and tangential dipoles: the absolute value of the difference was more than two orders of  
145 magnitude smaller than the EEG signal itself for all dipole orientations (Figure 2).

146 A more detailed comparison of EEG potentials predicted by the analytical model and  
147 the FEM model is shown in Figure 3. Here the computed EEG signal from a radial  
148 current dipole is shown for increasing polar angle  $\theta$  between the current dipole position  
149 vector  $\mathbf{r}_z$  and the measurement position vector  $\mathbf{r}$ . The sphere radii and conductivity values  
150 are consistent with Nunez and Srinivasan (2006) (Table 1). The curve for the analytical  
151 results (blue line) overlaps the FEM results (red dots). This figure also demonstrates that  
152 previously published formulas give incorrect predictions.

### 153 3.2 Limiting case

154 As an additional control we tested the limiting case where the conductivity was set to be  
155 the same for all four shells, i.e.,  $\sigma_{\text{brain}} = \sigma_{\text{CSF}} = \sigma_{\text{skull}} = \sigma_{\text{scalp}}$ , and equal to that of the



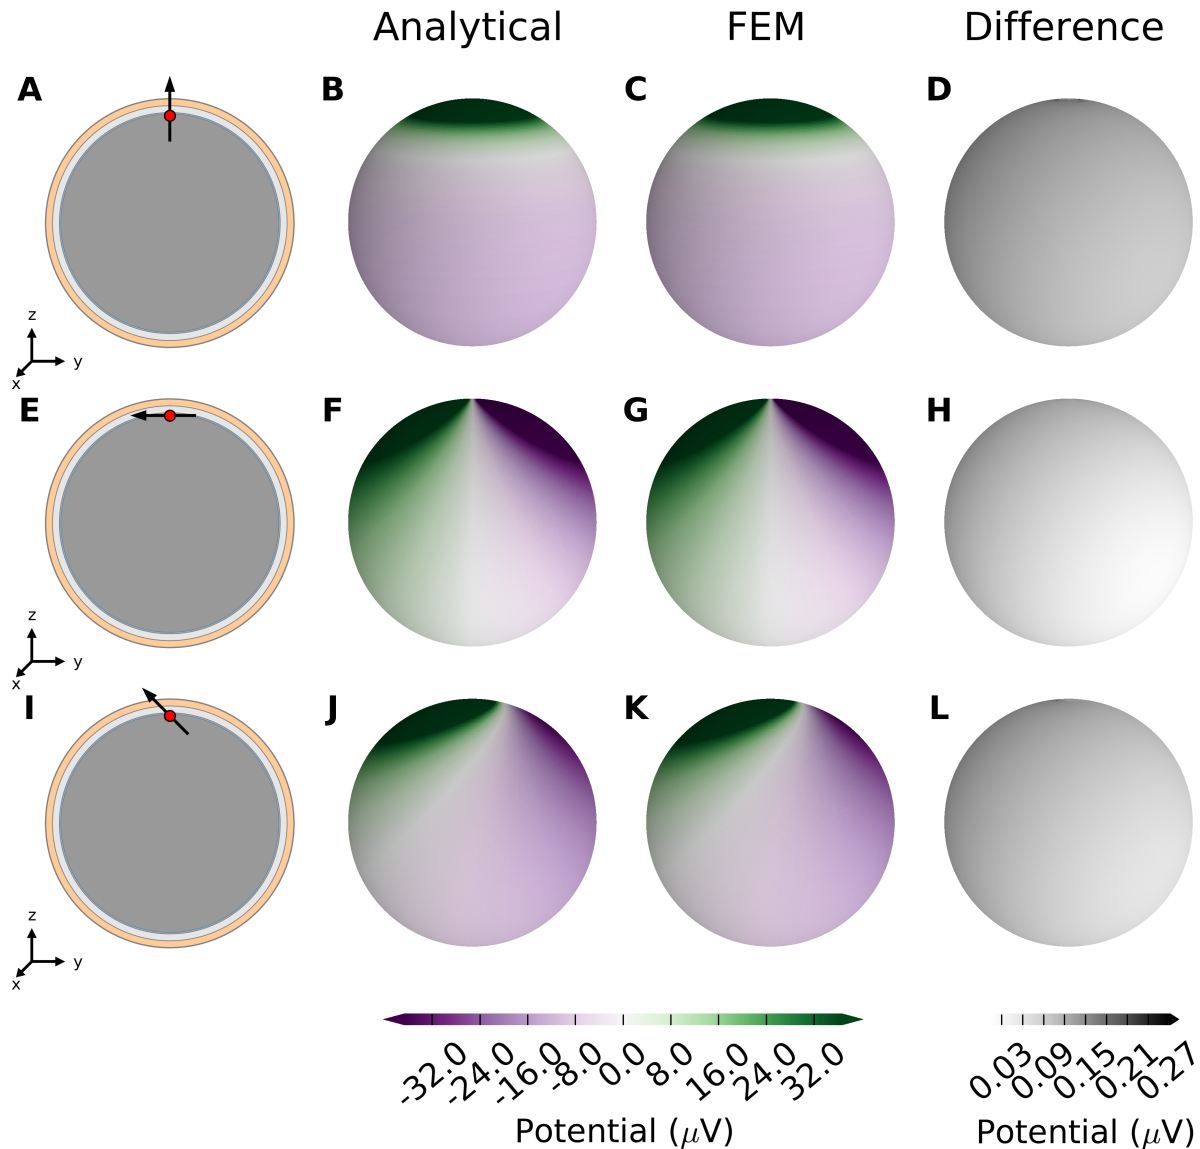

Figure 2: **EEG potentials computed with four-sphere model and FEM simulation for radial, tangential, and 45-degree dipole.** (A) A radial current dipole placed in the brain in the model as described in Table 1. The dipole (black arrow) is located at  $\mathbf{r}_z = [0, 0, 7.8 \text{ cm}]$  (red dot) and has a magnitude  $10^{-7} \text{ Am}$  to give scalp potentials some tens of microvolts in magnitude, typical for recorded EEG signals. (B) Resulting scalp potential calculated with the analytical four-sphere model. (C) Scalp potential computed with FEM. (D) Absolute difference between results from analytical calculation and FEM. The second row, panels E-H are equivalent to the top row, however for a tangential dipole parallel to  $y$  axis, in the  $x = 0$  plane. The bottom row, panels I-L are equivalent to the top row, however for a dipole that subtends 45-degrees to the  $z$  axis in the  $x = 0$  plane.

156 brain (Table 1). In this case, the resulting scalp potentials should be the same as those  
 157 calculated from a homogeneous single-sphere head model with radius equal to the scalp  
 158 radius  $r_4$ . For a dipole oriented along the radial direction inside a single homogeneous

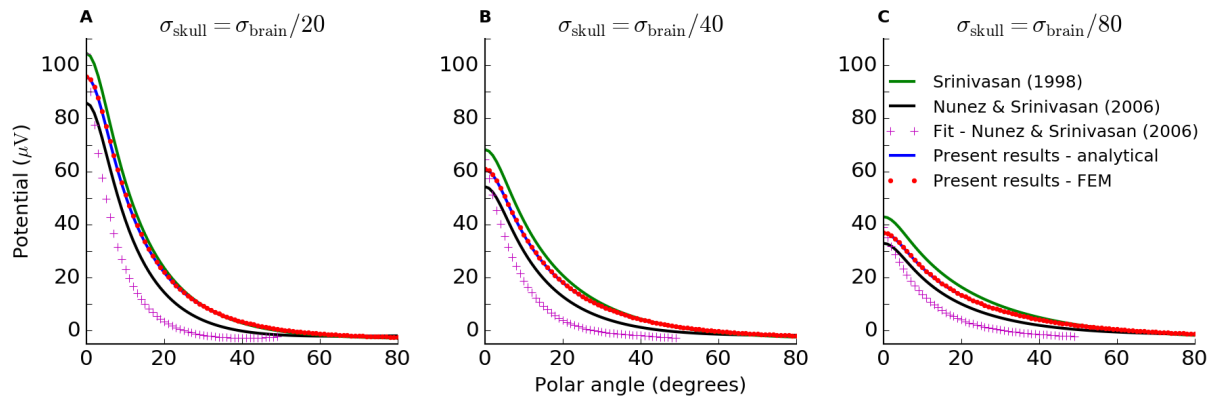

Figure 3: **Analytical solution of four-sphere model matches FEM simulation.** Scalp potentials from radial current dipole at position  $r_z = 7.8$  cm and magnitude  $10^{-7}$  Am to give results in observable range, while still facilitating direct comparison with the original plots in Srinivasan et al. (1998); Nunez and Srinivasan (2006). The resulting scalp potentials are shown for increasing polar angle  $\theta$  between the current dipole and the measurement position vector. The different lines show calculations with the various formulations of the four-sphere model discussed in this paper, as well as the FEM simulation. The green line shows potentials obtained from Srinivasan et al. (1998), Appendix A, Equations (A-1 – 11). The black line shows results from applying the formulation given in Nunez and Srinivasan (2006), Appendix G, Equations (G.1.9–10) and (G.2.1–10). The approximate solution from Nunez and Srinivasan (2006), Appendix G.4, Equation (G.4.1–3) is given by the pink crosses. The analytical formulation of the four-sphere model presented here is shown in blue, and the FEM simulation is given by the red dots. Panels **A**, **B** and **C** show results for different values of the skull conductivity, i.e.,  $\sigma_{\text{skull}} = \sigma_{\text{brain}}/20$ ,  $\sigma_{\text{brain}}/40$  and  $\sigma_{\text{brain}}/80$ , respectively.

159 sphere, the surface potentials are given by Equation (6.7) in Nunez and Srinivasan (2006):

$$\Phi(r_4, \theta, \phi) = \frac{p}{4\pi\sigma_1 r_4^2} \left\{ \frac{2(\cos\theta - f)}{(1 + f^2 - 2f\cos\theta)^{\frac{3}{2}}} + \frac{1}{f} \left[ \frac{1}{(1 + f^2 - 2f\cos\theta)^{\frac{1}{2}}} - 1 \right] \right\}, \quad (19)$$

160 where  $f = r_z/r_4$ . Comparison between the simplified four-sphere models and the homoge-  
 161 neous single-sphere model showed perfect agreement for the present formulation, while the  
 162 formulas listed in Srinivasan et al. (1998) and Nunez and Srinivasan (2006) give inaccurate  
 163 predictions (Figure 4).

## 164 4 Discussion

165 In this note we have revisited the analytical four-sphere model for computing EEG potentials  
 166 generated by current dipoles in the brain. The main contributions of this paper are the  
 167 presentation of corrected and validated formulas, as well as numerical scripts for using them,  
 168 allowing users to readily apply this important forward-model in the field of EEG analysis.

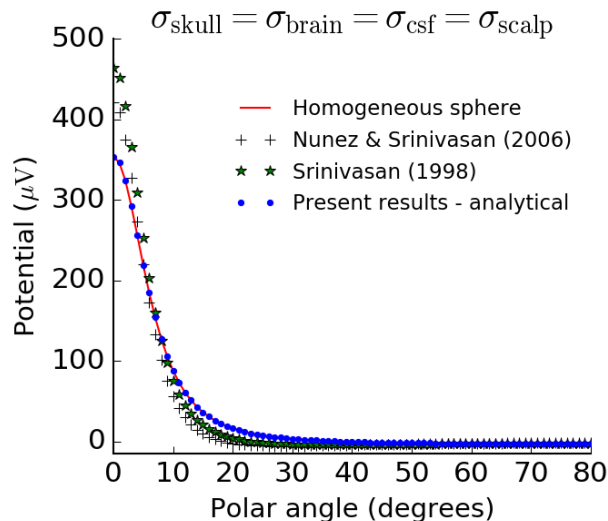

Figure 4: **Analytical solution of the four-sphere model satisfies control test for limiting case.** Four-sphere models in the limiting case where the conductivity of the skull, CSF, and scalp are equal to the conductivity of the brain, compared to the equivalent model for a single homogeneous sphere, Equation (19). We used a radial dipole of magnitude  $10^{-7}$  Am positioned a distance  $r_z = 7.8$  cm away from the center of the sphere, consistent with Figure 2 and 3.

169 We also provide a set of FEM scripts which model the four-sphere model consistent with  
170 the analytical solution.

171 In addition to facilitating the use of the four-sphere model in EEG signal analysis (see,  
172 e.g., Peraza et al. (2012); Wong et al. (2008); Chu et al. (2012)), the present formulas  
173 and scripts will also be a resource for benchmarking comprehensive numerical schemes for  
174 computing EEG signals based on detailed head reconstructions such as the Finite Element  
175 Method (FEM) (Larson and Bengzon, 2013). The FEM approach is not restricted to  
176 specific head symmetry assumptions and can take into account an arbitrarily complex  
177 spatial distribution of electrical conductivity representing the electrical properties of the  
178 head. This is done by constructing a complicated numerical mesh for the head, a task that  
179 is often technically challenging. The present validated analytical solution for the four-sphere  
180 model can thus serve as a ground-truth benchmark against which the correctness and  
181 computational precision of such comprehensive numerical implementations can be tested.

## 182 Acknowledgments, funding and conflict of interest state- 183 ment

184 We thank Paul L. Nunez and Ramesh Srinivasan for useful personal contact. The study  
185 received funding from the Simula-UCSD-University of Oslo Research and PhD training  
186 (SUURPh) program, funded by the Norwegian Ministry of Education and Research, the

187 European Union Horizon 2020 Research and Innovation Programme under Grant Agreement  
188 No. 720270 [Human Brain Project (HBP) SGA1], from the EC-FP7-PEOPLE sponsored  
189 NAMASEN Marie-Curie ITN grant 264872 and the Polish National Science Centre’s OPUS  
190 grant (2015/17/B/ST7/04123). The authors declare no conflict of interest.

## 191 References

- 192 Alnæs, M. S., Blechta, J., Hake, J., Johansson, A., Kehlet, B., Logg, A., et al. (2015). The  
193 FEniCS Project Version 1.5. *Archive of Numerical Software* 3. doi:10.11588/ans.2015.  
194 100.20553
- 195 Banger, N. B., Schomer, D. L., Dehghani, N., Ulbert, I., Cash, S., Papavasiliou, S., et al.  
196 (2010). Experimental validation of the influence of white matter anisotropy on the  
197 intracranial eeg forward solution. *Journal of computational neuroscience* 29, 371–387
- 198 Chu, C. J., Kramer, M. A., Pathmanathan, J., Bianchi, M. T., Westover, M. B., Wison,  
199 L., et al. (2012). Emergence of stable functional networks in long-term human electroen-  
200 cephalography. *The Journal of Neuroscience* 32, 2703–2713
- 201 Geuzaine, C. (2009). Gmsh: a three-dimensional finite element mesh generator with  
202 built-in pre- and post-processing facilities. *International Journal for Numerical Methods*  
203 *in Engineering* 79, 1309–1331
- 204 Hämäläinen, M., Haari, R., Ilmoniemi, R. J., Knuutila, J., and Lounasmaa, O. V. (1993).  
205 Magnetoencephalography — theory, instrumentation, and application to noninvasive  
206 studies of the working human brain. *Reviews of Modern Physics* 65
- 207 Huang, Y., Parra, L. C., and Haufe, S. (2016). The New York Head—a precise standardized  
208 volume conductor model for EEG source localization and tES targeting. *NeuroImage*  
209 140, 150–162
- 210 Kehlet, B. (2016). mshr. '<https://bitbucket.org/fenics-project/mshr>'
- 211 Larson, M. G. and Bengzon, F. (2013). *The Finite Element Method: Theory, Implementa-*  
212 *tion, and Applications* (Springer-Verlag, Berlin Heidelberg)
- 213 Logg, A., Mardal, K.-A., and Wells, G. N. (eds.) (2012). *Automated Solution of Differential*  
214 *Equations by the Finite Element Method*, vol. 84 of *Lecture Notes in Computational*  
215 *Science and Engineering* (Berlin, Heidelberg: Springer Berlin Heidelberg). doi:10.1007/  
216 978-3-642-23099-8
- 217 Nunez, P. L. and Srinivasan, R. (2006). *Electric Fields of the Brain* (New York: Oxford  
218 University Press), 2nd edn.

- 219 Peraza, L. R., Asghar, A. U., Green, G., and Halliday, D. M. (2012). Volume conduction  
220 effects in brain network inference from electroencephalographic recordings using phase  
221 lag index. *Journal of neuroscience methods* 207, 189–199
- 222 Pettersen, K. H., Lindén, H., Dale, A. M., and Einevoll, G. T. (2012). Extracellular spikes  
223 and CSD. *Handbook of Neural Activity Measurement*
- 224 Sanei, S. and Chambers, J. (2007). *EEG Signal processing, 2007* (John Wiley & Sons Ltd,  
225 The Atrium, Southern Gate, Chichester, West Sussex PO19 8SQ, England)
- 226 Schöberl, J. (1997). NETGEN an advancing front 2D/3D-mesh generator based on abstract  
227 rules. *Computing and Visualization in Science* 1, 41–52. doi:10.1007/s007910050004
- 228 Schomer, D. L. and da Silva, F. L. (2012). *Niedermeyer’s Electroencephalography: Basic*  
229 *Principles, Clinical Applications, and Related Fields* (Wolters Kluwer Health)
- 230 Srinivasan, R., Nunez, P. L., and Silberstein, R. B. (1998). Spatial filtering and neocortical  
231 dynamics: estimates of EEG coherence. *IEEE Transactions on Biomedical Engineering*
- 232 Wong, D. K., Grosenick, L., Uy, E. T., Guimaraes, M. P., Carvalhaes, C. G., Desain, P.,  
233 et al. (2008). Quantifying inter-subject agreement in brain-imaging analyses. *NeuroImage*  
234 39, 1051–1063

## 235 A Mathematical derivation of four-sphere model

236 The four-sphere model equations for radial and tangential dipoles are given in Equations (5),  
237 (6), (17) and (18). Here we describe how the seven unknown constants (Equation (7)–(16))  
238 can be determined by the seven boundary conditions (Equations (2)–(4)). We show the  
239 calculations for radial dipoles only, however, the derivation presented applies to both radial  
240 and tangential dipoles, due to similarity of the models.

We start by finding the derivative of  $\Phi^s(r, \theta)$  from Equation (6):

$$\frac{\partial}{\partial r} \Phi^s(r, \theta) = \frac{p}{4\pi\sigma_1 r_z^2} \sum_{n=1}^{\infty} \left[ A_n^s \left( \frac{n}{r} \right) \left( \frac{r}{r_s} \right)^n - B_n^s \left( \frac{n+1}{r} \right) \left( \frac{r_s}{r} \right)^{n+1} \right] n P_n(\cos \theta).$$

For the Neumann boundary condition on the scalp boundary, Equation (4), we make use of the relation above, and get:

$$\frac{\partial}{\partial r} \Phi^4(r_4, \theta) = \frac{p}{4\pi\sigma_1 r_z^2} \sum_{n=1}^{\infty} \left[ A_n^4 \left( \frac{n}{r_4} \right) \left( \frac{r_4}{r_4} \right)^n - B_n^4 \left( \frac{n+1}{r_4} \right) \left( \frac{r_4}{r_4} \right)^{n+1} \right] n P_n(\cos \theta) = 0.$$

$$\begin{aligned} &\Rightarrow A_n^4 \left( \frac{n}{r_4} \right) - B_n^4 \left( \frac{n+1}{r_4} \right) = 0 \quad \forall n \\ &\Rightarrow B_n^4 = \frac{n}{n+1} A_n^4. \end{aligned} \quad (20)$$

Next, we apply the Dirichlet boundary condition on the skull boundary, i.e., Equation (2) for  $s = 3$ :

$$\begin{aligned} \Phi^4(r_3) &= \Phi^3(r_3) \\ \frac{p}{4\pi\sigma_1 r_z^2} \sum_{n=1}^{\infty} \left[ A_n^4 \left( \frac{r_3}{r_4} \right)^n + B_n^4 \left( \frac{r_4}{r_3} \right)^{n+1} \right] n P_n(\cos \theta) \\ &= \frac{p}{4\pi\sigma_1 r_z^2} \sum_{n=1}^{\infty} \left[ A_n^3 \left( \frac{r_3}{r_3} \right)^n + B_n^3 \left( \frac{r_3}{r_3} \right)^{n+1} \right] n P_n(\cos \theta) \\ A_n^4 \left( \frac{r_3}{r_4} \right)^n + B_n^4 \left( \frac{r_4}{r_3} \right)^{n+1} &= A_n^3 + B_n^3. \end{aligned}$$

Inserting the expression for  $B_n^4$ , Equation (20), using the notation  $r_{ij} \equiv r_i/r_j$ :

$$\begin{aligned} A_n^4 \left( r_{34}^n + \frac{n}{n+1} r_{43}^{n+1} \right) &= A_n^3 + B_n^3 \\ \Rightarrow A_n^4 &= \frac{n+1}{n} \frac{A_n^3 + B_n^3}{\frac{n+1}{n} r_{34}^n + r_{43}^{n+1}}. \end{aligned} \quad (21)$$

241 Note that the multiplication factor  $\frac{n+1}{n}$  is missing in Nunez and Srinivasan (2006), Ap-  
242 pendix G, Equation (G.2.9).

Further, we look at the Neumann boundary condition on the skull boundary, i.e. Equation (3) for  $s = 3$ , using the notation  $\sigma_{ij} \equiv \sigma_i/\sigma_j$ :

$$\begin{aligned} \sigma_4 \frac{\partial \Phi^4}{\partial r}(r_3) &= \sigma_3 \frac{\partial \Phi^3}{\partial r}(r_3) \\ \sigma_4 \left( A_n^4 \frac{n}{r_3} \left( \frac{r_3}{r_4} \right)^n - B_n^4 \frac{n+1}{r_3} \left( \frac{r_4}{r_3} \right)^{n+1} \right) &= \sigma_3 \left( A_n^3 \frac{n}{r_3} \left( \frac{r_3}{r_3} \right)^n - B_n^3 \frac{n+1}{r_3} \left( \frac{r_3}{r_3} \right)^{n+1} \right) \\ n A_n^4 r_{34}^n - (n+1) B_n^4 r_{43}^{n+1} &= \sigma_{34} (n A_n^3 - (n+1) B_n^3). \end{aligned}$$

Inserting Equation (20),

$$n A_n^4 (r_{34}^n - r_{43}^{n+1}) = \sigma_{34} (n A_n^3 - (n+1) B_n^3),$$

and applying Equation (21),

$$n \frac{n+1}{n} \frac{A_n^3 + B_n^3}{\frac{n+1}{n} r_{34}^n + r_{43}^{n+1}} (r_{34}^n - r_{43}^{n+1}) = \sigma_{34} (nA_n^3 - (n+1)B_n^3).$$

From this we find that,

$$B_n^3 = \frac{\frac{n}{n+1} \sigma_{34} - \frac{r_{34}^n - r_{43}^{n+1}}{\frac{n+1}{n} r_{34}^n + r_{43}^{n+1}}}{\sigma_{34} + \frac{r_{34}^n - r_{43}^{n+1}}{\frac{n+1}{n} r_{34}^n + r_{43}^{n+1}}} A_n^3,$$

which we can write as:

$$B_n^3 = V_n A_n^3 \quad \text{where} \quad V_n = \frac{\frac{n}{n+1} \sigma_{34} - \frac{r_{34}^n - r_{43}^{n+1}}{\frac{n+1}{n} r_{34}^n + r_{43}^{n+1}}}{\sigma_{34} + \frac{r_{34}^n - r_{43}^{n+1}}{\frac{n+1}{n} r_{34}^n + r_{43}^{n+1}}}. \quad (22)$$

243 Here, the  $\sigma_{34}$ -term in the numerator of  $V_n$  differs from Nunez and Srinivasan (2006)  
 244 (Equation (G.2.1)) and Srinivasan et al. (1998) (Equation (A-2)) in the sense that the  
 245 multiplication factor is inverted.

For the CSF Dirichlet boundary condition we can follow the same procedure as for the skull Dirichlet boundary condition, and we get,

$$\begin{aligned} A_n^3 \left( \frac{r_2}{r_3} \right)^n + B_n^3 \left( \frac{r_3}{r_2} \right)^{n+1} &= A_n^2 \left( \frac{r_2}{r_2} \right)^n + B_n^2 \left( \frac{r_2}{r_2} \right)^{n+1} \\ \Rightarrow A_n^3 r_{23}^n + B_n^3 r_{32}^{n+1} &= A_n^2 + B_n^2. \end{aligned}$$

Inserting the expression for  $B_n^3$  from Equation (22):

$$\begin{aligned} A_n^3 (r_{23}^n + V_n r_{32}^{n+1}) &= A_n^2 + B_n^2 \\ \Rightarrow A_n^3 &= \frac{A_n^2 + B_n^2}{r_{23}^n + r_{32}^{n+1} V_n}. \end{aligned} \quad (23)$$

246 Here, we notice a typographical error in the expression for  $A_n^3$  in Srinivasan et al. (1998),  
 247 Equation (A-8): there should be an  $A_n^2$ -term in the numerator, not  $A_n^3$ .

Next, we apply the Neumann CSF boundary condition. Starting out with,

$$\sigma_3 \frac{\partial \Phi^3}{\partial r}(r_2) = \sigma_2 \frac{\partial \Phi^2}{\partial r}(r_2),$$

and making use of the expressions for  $B_n^3$  and  $A_n^3$ , we find that,

$$B_n^2 = Y_n A_n^2 \quad \text{where} \quad Y_n = \frac{\frac{n}{n+1}\sigma_{23} - \frac{\frac{n}{n+1}r_{23}^n - V_n r_{32}^{n+1}}{r_{23}^n + V_n r_{32}^{n+1}}}{\sigma_{23} + \frac{\frac{n}{n+1}r_{23}^n - V_n r_{32}^{n+1}}{r_{23}^n + V_n r_{32}^{n+1}}}. \quad (24)$$

248 Note that there's a subtle difference between the  $Y_n$  presented here, and Nunez and  
 249 Srinivasan (2006) (Equation (G.2.2)) and Srinivasan et al. (1998) (Equation (A-3)): The  
 250 second term of the numerator is a fraction. Here, the  $r_{23}^n$  factor should not be multiplied  
 251 by the whole fraction, but rather only the  $\frac{n}{n+1}$ -term in the numerator.

The Dirichlet boundary condition on the brain boundary is:

$$\begin{aligned} \Phi^2(r = r_1) &= \Phi^1(r = r_1) \\ A_n^2 \left(\frac{r_1}{r_2}\right)^n + B_n^2 \left(\frac{r_2}{r_1}\right)^{n+1} &= A_n^1 \left(\frac{r_1}{r_1}\right)^n + \left(\frac{r_z}{r_1}\right)^{n+1} \\ A_n^2 r_{12}^n + B_n^2 r_{21}^{n+1} &= A_n^1 + r_{z1}^{n+1}. \end{aligned}$$

Inserting the expression for  $B_n^2$  from Equation (24):

$$\begin{aligned} A_n^2 (r_{12}^n + Y_n r_{21}^{n+1}) &= A_n^1 + r_{z1}^{n+1} \\ \Rightarrow A_n^2 &= \frac{A_n^1 + r_{z1}^{n+1}}{r_{12}^n + r_{21}^{n+1} Y_n}. \end{aligned} \quad (25)$$

Finally, we solve the Neumann boundary condition on the brain boundary,

$$\sigma_2 \frac{\partial \Phi^2}{\partial r}(r_1) = \sigma_1 \frac{\partial \Phi^1}{\partial r}(r_1).$$

Inserting the expressions for  $A_n^2$  and  $B_n^2$  from Equations (25) and (24), we find,

$$A_n^1 = \frac{\frac{n+1}{n}\sigma_{12} + Z_n}{\sigma_{12} - Z_n} r_{z1}^{n+1} \quad \text{where} \quad Z_n = \frac{r_{12}^n - \frac{n+1}{n}Y_n r_{21}^{n+1}}{r_{12}^n + Y_n r_{21}^{n+1}}. \quad (26)$$

252 The  $A_n^1$ -term in Srinivasan et al. (1998) (Equation (A-5)) is not consistent with Nunez and  
 253 Srinivasan (2006) (Equation (G.2.4)) equal to Equation (26): a multiplication factor  $p/\sigma_1$   
 254 is lacking,  $r_{z1}^{n-1}$  should be  $r_{z1}^{n+1}$ . Moreover,  $B_n^1$  needs to be defined in order for the model  
 255 description in Srinivasan et al. (1998), Appendix A to give potentials in brain tissue.
